# Supplementary material
Source: publisher figshare collection journal article supplement (https://geolsoc.figshare.com/ndownloader/files/22475843)
Supplement: Supplementary file 1 [file 22475843]

| Supplementary Table 5: Whole rock isotopic compositions of Sr, Nd, and Pb | | | | | | | | | | | | |
| --- | --- | --- | --- | --- | --- | --- | --- | --- | --- | --- | --- | --- |
|  | | | | | | | | | | | | |
| Sample **a** | | | 87Sr  ––––  86Sr | 87Sr690  ––––––  86Sr | 143Nd  ––––––  144Nd | Nd690 | 206Pb  –––––  204Pb | 207Pb  –––––  204Pb | 208Pb **d**  –––––  204Pb | 206Pb690  –––––  204Pb | 207Pb690  –––––  204Pb | 208Pb690  –––––  204Pb |
|  | | | | | | | | | | | | |
| 1 | | AT4 d* | 0.703692±3 | 0.70264 | 0.512854±3 | 4.9 | 19.011 | 15.575 | 38.412 | 17.91 | 15.51 | 37.48 |
| 2 | | AT9 d* | 0.703453±4 | 0.70261 | 0.512910±3 | 6.5 | 18.794 | 15.571 | 38.288 | 17.13 | 15.47 | 36.90 |
| 3 | | AT13 g | 0.702601±3 | 0.70247 | 0.512957±6 | 5.5 | 18.369 | 15.552 | 37.983 | 17.66 | 15.51 | 37.26 |
| 4 | | AT15 g | 0.702616±4 | 0.70257 | 0.512951±4 | 4.3 | 18.421 | 15.598 | 38.164 | *18.00* b | *15.57* b | 37.63 |
| 5 | | AT18 g | 0.702750±4 | 0.70266 | 0.512871±6 | 4.2 | 18.830 | 15.647 | 38.644 | 18.50 | 15.63 | 38.36 |
| 6 | | AT20 g | 0.702769±4 | 0.70264 | 0.512833±4 | 4.5 | 18.884 | 15.651 | 38.690 | 18.80 | 15.65 | 38.64 |
| 7 | | AT27 d | 0.702875±4 | 0.70264 | 0.512887±3 | 6.5 | 18.328 | 15.556 | 37.942 | 17.71 | 15.52 | 37.33 |
| 8 | | AT29 d | 0.703006±3 | 0.70268 | 0.512814±5 | 7.3 | 18.240 | 15.548 | 37.802 | 17.42 | 15.50 | 37.02 |
| 9 | | AT37 d | 0.702793±4 | 0.70249 | 0.512902±4 | 6.3 | 18.642 | 15.552 | 38.144 | 17.59 | 15.49 | 37.14 |
| 10 | | AT40 g* | 0.702727±4 | 0.70261 | 0.512928±4 | 5.5 | 18.411 | 15.549 | 37.980 | 17.58 | 15.50 | 37.24 |
|  | |  |  |  |  |  |  |  |  |  |  |  |
| **a** | d = diorite/quartz diorite; g = gabbronorite. | | | | | | | | | | | |
| **b** | U concentration was below detection limit | | | | | | | | | | | |

* Dated sample

.
